# Supplementary material
Source: PubMed Central journal article supplement (PMC6866478)
Supplement: HBM-39-1898-s001.pdf [file HBM-39-1898-s001.pdf]

## Supplementary Materials

### *Selection of Studies*

The BrainMap database was employed for the retrieval of relevant neuroimaging experiments. As reported in the User Manual, BrainMap uses a structured standardized coding scheme which describes published human neuroimaging experimental results. This taxonomy has been used to describe over 3600 publications and 15000 experiments, drawing upon over 110000 subjects and reporting over 120000 coordinates. The main division of the coding scheme is between *structural* (VBM) and *functional* data. For this meta-analysis only papers labeled as “Structural” have been used. Considering the studies in this category, the database consists of 980 papers, 3093 experiments, 73938 subjects and 21481 locations.

The software application “Sleuth” has been used to search the database for experiments of interest and view the relevant search results in a standard brain space. This procedure allowed us to identify 242 studies involving SCZD, ASD, and OCSD (126, 96 and 20, respectively).

In a second step, a systematic search strategy was used to identify relevant studies whose temporal boundaries are not included in the BrainMap database, published until 15 July 2016, across the online database most frequently used in the international literature (Medline database with PubMed literature search: <http://www.ncbi.nlm.nih.gov/pubmed>) involving SCZD, ASD, and OCSD as they are defined by DSM-5 (American Psychiatric Association, 2013).

First, association measures have been analyzed to get a perspective on the biomedical research literature: co-occurrences of all the terms concerning psychiatric spectra and neuroimaging acquisition technique have been analyzed by measuring the degree to which two queries coincide among all publications. The corresponding co-occurrences of publications have been returned in the form of natural logarithm of the Jaccard index ( $\ln J$ ) (Jaccard, 1901). Secondly, we have adopted the MeSH hierarchy for Mental Disorders in PubMed automatic routines to find relevant published article concerning ASD, SCZD and OCSD. In particular, we provided a *set* of PubMed queries as input, adopting Boolean operators and PubMed search field tags. Indeed, to identify the greatest number of items we used the function [ALL] concerning the possibility to find MeSH terms in “all field” of an article. For each spectrum, the search algorithm has been constructed as follows:

- FIRST SET

- (#spectrum 1: “autism spectrum disorder” OR [ALL] “ASD” [ALL]) AND (# acquisition technique: “voxel-based morphometry” [ALL] OR “VBM” [ALL]; “diffusion tensor imaging” OR “DTI” [ALL]).

- SECOND SET

- (#spectrum 2: “obsessive-compulsive disorder” OR [ALL] “OCD” [ALL]) AND (# acquisition technique: “voxel-based morphometry” [ALL] OR “VBM” [ALL]; “diffusion tensor imaging” OR “DTI” [ALL]).

- THIRD SET

- (#spectrum 3: “schizophrenia” OR [ALL] “schizoaffective disorder” [ALL]) AND (# acquisition technique: “voxel-based morphometry” [ALL] OR “VBM” [ALL]; “diffusion tensor imaging” OR “DTI” [ALL]).

As regards the search and selection process, additional considerations are necessary: (1) concerning the OCSD, PubMed has found under the heading of the spectrum also articles about Tic disorder that, after a manual verification, were found to contain the correct MeSH term of classification [i.e., Study ID: 12,13,31,50,51,71]; (2) at the beginning of the data collection in 2012, PubMed did not contain a MeSH term for SCZD: so it has been necessary to resort to the terms “schizophrenia” and “schizoaffective disorder”.

Up until 15 July 2016, 1419 papers involving SCZD, ASD, and OCSD had been indexed on BrainMap database and PubMed. All the selected articles that did not meet the inclusion criteria were excluded. In particular, two experienced researchers have reviewed all the articles using a double-blind procedure to ensure: (1) both the presence of the healthy control group and the pathological sample; (2) that the results were reported by using the Talairach/Tournoux or Montreal Neurological Institute (MNI) coordinates; (3) that the foci of interest had a significance of at least  $<0.05$ ; (4) that the studies described cerebral structural changes visible with VBM or DTI (only FA technique); (5) that the studies were original works; (6) that original diagnosis was made on the basis of DSM criteria and clinical test batteries. Furthermore, instances of multiple references to the same datasets across articles were identified so as to make sure that only one reference to the same data contributed to the coordinates for the present meta-analysis (See Graph S1 [PRISMA flow chart] and Table S1).

All the studies were examined independently to detect dissimilarities or discrepancies, which were afterward collectively discussed and resolved. The researchers who carried out this research stage have reached substantial agreement (% of agreement = 94.3096; Cohen’s  $K=0.7409$ ).

Relevant descriptive information was extracted from each article. On the grounds of the aforementioned criteria, 203 papers were included in the meta-analysis, with 218 identified experimental samples and a total of 8693 subjects: 1719 individuals of the ASD group, 1738 of the OCSD group, and 5236 of the SCZD group. Tables S1-S2 provide a detailed description of methods and the sample of the selected studies (see also Figure S2). The number of WM and GM changes foci were established for each study. In order to facilitate analysis, coordinates from MNI space were converted into Talairach coordinates by using Lancaster transformation (Lancaster et al., 2007).

# Supplementary Tables and Figures

Figure S1. Selection strategy.

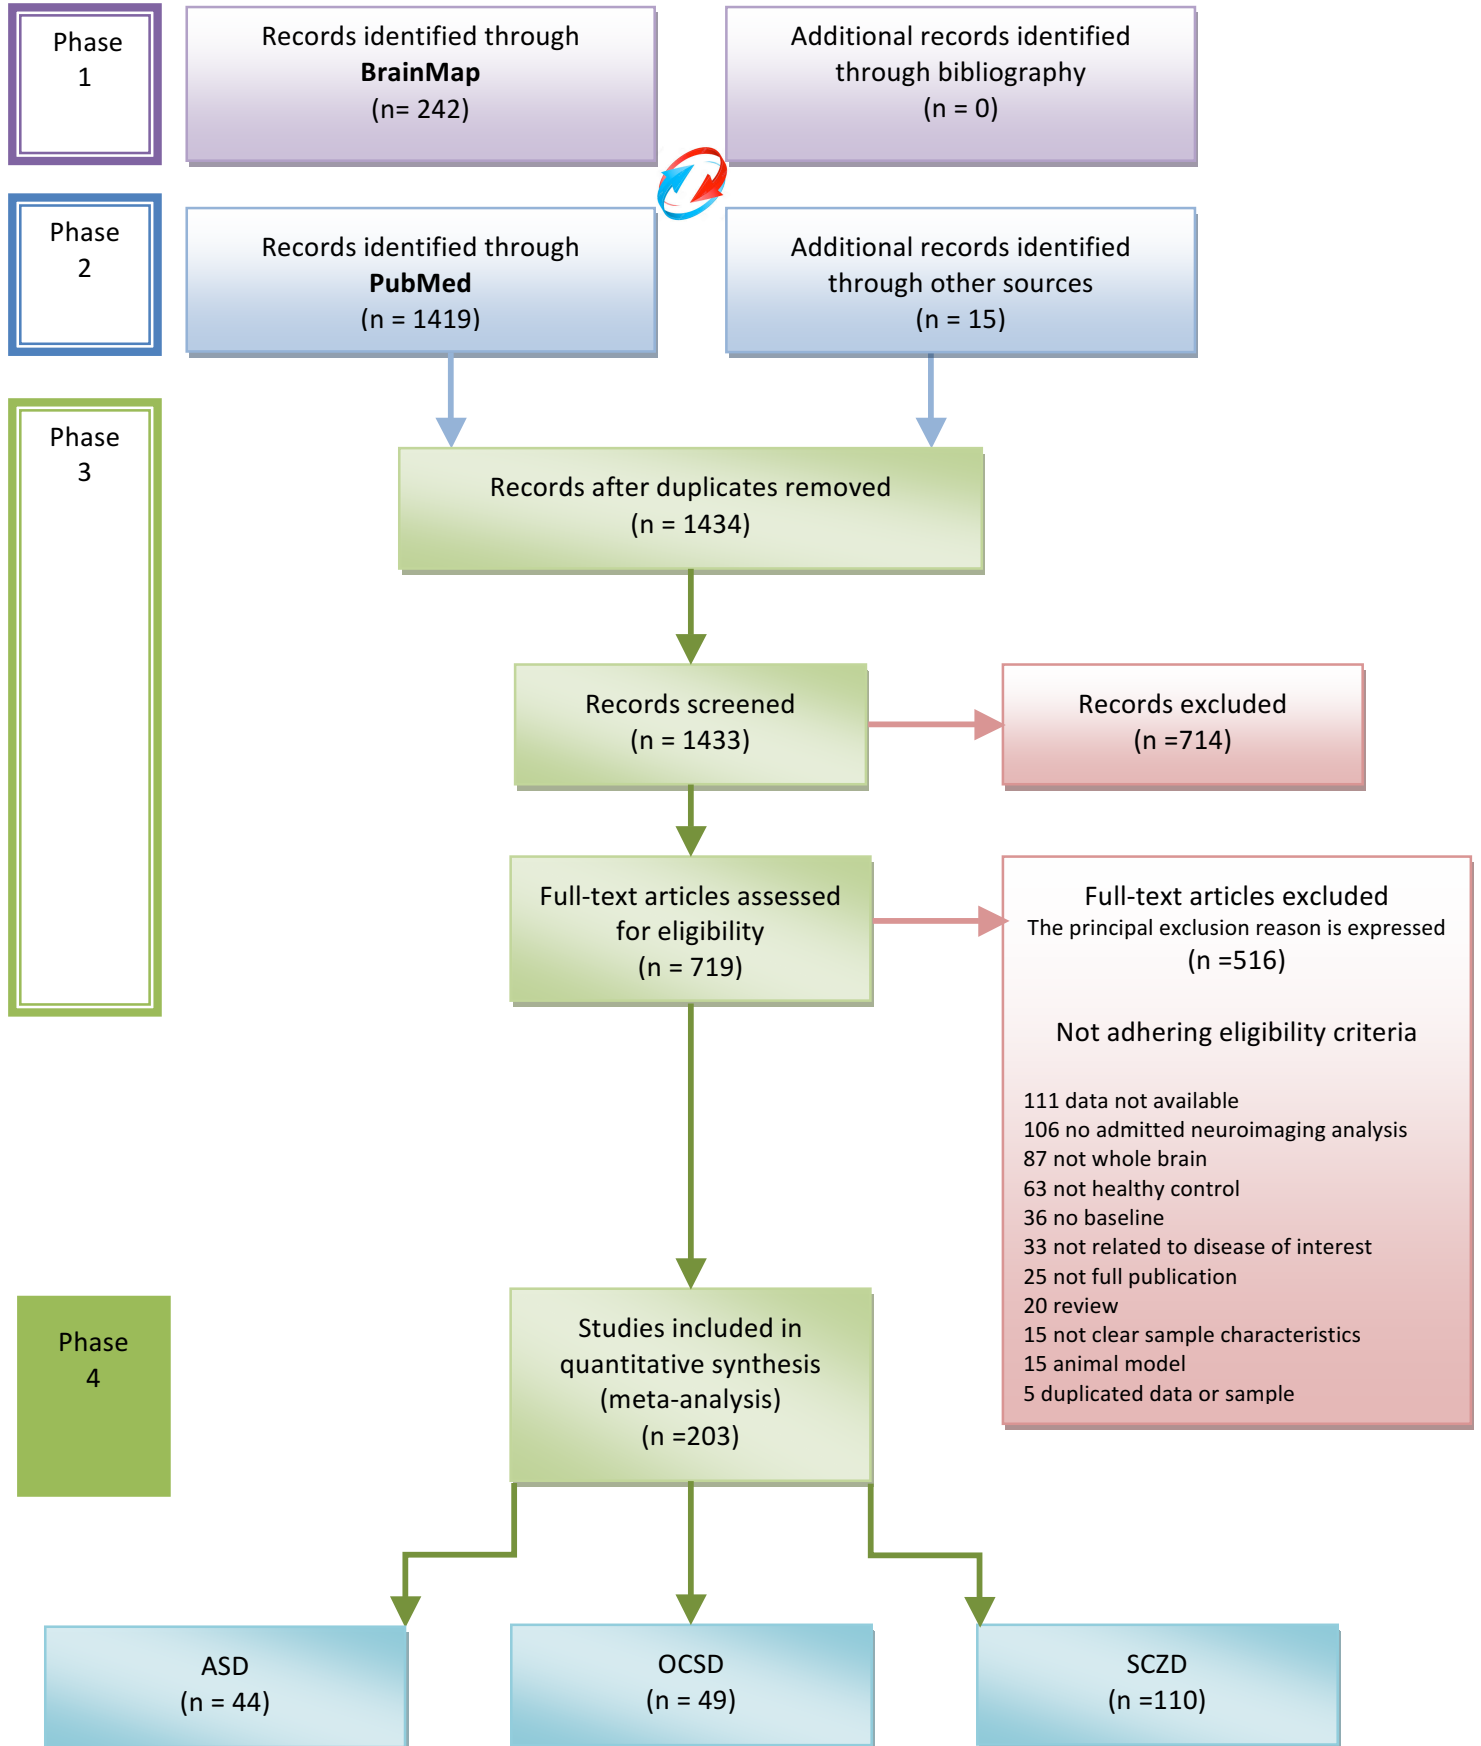

**Table S1.** Selected studies for the meta-analysis<sup>1</sup>.

| ID |      | First Author    | Year  | Reference                                       | N  | M/F   | age (year)* | Scanner (Tesla) | slice thick (mm)** | Smoothing (mm) | Method                    |
|----|------|-----------------|-------|-------------------------------------------------|----|-------|-------------|-----------------|--------------------|----------------|---------------------------|
| 1  | ASD  | Cheung C        | 2009  | Jour Child Psychology Psychiatry 50(9): 1102-12 | 13 | 12/1  | 9.3±2.6     | 1.5             | 5                  | 6              | SPM2                      |
| 2  | ASD  | Cheng Y         | 2010  | Neuroimage 50(3): 873-82                        | 25 | 25/0  | 13.71±2.54  | 1.5             | 2.2                | -              | FSL4.1                    |
| 3  | ASD  | Noriuchi M      | 2010  | Brain Research 1362: 141-9                      | 7  | 6/1   | 13.96±2.68  | 3               | 2                  | 6              | IDL/ SPM2                 |
| 4  | ASD  | McAlonan GM     | 2002  | Brain 125: 1594-1606                            | 21 | 19/2  | 32±10       | 1.5             | 1.5                | -              | SMaRT on SPARC            |
| 5  | ASD  | Craig MC        | 2007  | Brit Jour Psychiatry 191: 224-8                 | 14 | 0/14  | 37.9±11.4   | 1.5             | 1.5                | 5              | SPM2                      |
| 6  | ASD  | McAlonan GM     | 2009  | Psychol Med 39(11): 1885-93                     | 18 | 15/3  | 11.2±2.5    | 1.5             | 3                  | 4.4            | BAMM on SPARC workstation |
| 7  | ASD  | McAlonan GM     | 2005  | Brain 128(Pt 2): 268-76                         | 17 | 16/1  | 12±1.8      | 1.5             | 3                  | 4.4            | BAMM on SPARC workstation |
| 8  | ASD  | Mengotti P      | 2011  | Brain Res. Bull. 84(2): 189-95                  | 20 | 18/2  | 7±2.25      | 1.5             | 5                  | 8              | SPM5                      |
| 9  | ASD  | Spencer MD      | 2006  | Neuroimage 33(4): 1136-44                       | 63 | 34/29 | 16.0±1.8    | 1.5             | -                  | 12             | SPM99                     |
| 10 | ASD  | Ecker C         | 2010  | Neuroimage 49(1): 44-56                         | 22 | 22/0  | 27±7        | 3               | 1.1                | 8              | SPM5                      |
| 11 | ASD  | Ke X            | 2009  | Brain Research 1265: 171-7                      | 12 | 12/0  | 11.2±2.5    | 1.5             | 2                  | 8              | SPM5                      |
| 12 | OCSD | Mueller-Vahl KR | 2009  | BMC Neuroscience 10: 47                         | 19 | 19/0  | 18-60       | 1.5             | 3                  | 8              | SPM2                      |
| 13 | OCSD | Thomalla G      | 2009  | Brain 132: 765-777                              | 15 | 13/2  | 34.5±8.9    | 3               | 1                  | 8              | SPM2                      |
| 14 | OCSD | Lochner C       | 2012  | Jour Psychiatry Neurosci 37(3): 193-9           | 15 | 10/5  | 11.2±4.9    | 3               | 2.2                | -              | FSL-TBSS                  |
| 15 | OCSD | Menzies L       | 2008  | Am J Psychiatry 165: 1308-1315                  | 30 | 9/21  | 32.2±11.1   | 1.5             | 4                  | 8              | SPM5                      |
| 16 | OCSD | Yoo SY          | 2007  | Acta Psychiatr Scand 116: 211-219               | 13 | 8/5   | 27.8±7.3    | 1.5             | -                  | 10             | SPM2                      |
| 17 | OCSD | Togao O         | 2010  | Psychiatry Research: Neuroimaging 184: 29-37    | 23 | 9/14  | 32.6±9.7    | 1.5             | -                  | 12             | SPM2                      |
| 18 | SCZD | Whitford TJ     | 2007  | Am Journ Psychiatry 164: 1082-1089              | 41 | -     | 19.8±3.3    | 1.5             | -                  | 12             | SPM2                      |
| 19 | ASD  | Barnea-Goraly N | 2004  | Biol Psychiatry 2004 Feb 1;55(3):323-6          | 7  | 7/0   | 14.6±3.4    | 1.5             | 5                  | 4              | SPM99                     |
| 20 | ASD  | Keller TA       | 2007  | Neuro Report 18(1): 23-7                        | 34 | 34/0  | 18.9±7.3    | 3               | 3                  | 8              | SPM2                      |
| 21 | ASD  | Cheon KA        | 2011  | Brain Research 1417: 77-86                      | 17 | 17/0  | 11.0±2.1    | 1.5             | 3                  | -              | DTIfit/FSL TDT toolbox    |
| 22 | ASD  | Jou RJ          | 2011a | Austr New Ze Jou Psychiatry 45(2): 153-62       | 10 | 10/0  | 13.5±4      | 1.5             | 4                  | -              | BioImage Suite            |

<sup>1</sup> The items shown in the table are the result of the entire selection process as shown in PRISMA (2009) flow chart and table S2. The starting point for the selection can be traced in the algorithms and in the additional considerations previously proposed.

|    |      |                   |       |                                                                            |                |                      |                        |     |     |     |          |
|----|------|-------------------|-------|----------------------------------------------------------------------------|----------------|----------------------|------------------------|-----|-----|-----|----------|
| 23 | ASD  | Jou RJ            | 2011b | AJNR Am Jour NeuroRadiology 32(9): 1607-13                                 | 15             | -                    | 10.9±3.7               | 3   | 2.5 | -   | FSL/TBSS |
| 24 | ASD  | Pardini M         | 2009  | Eur Journ Neurol 16(11): 1185-90                                           | 10             | 10/0                 | 19.7±2.83              | 3   | 2   | 4   | FDT      |
| 25 | ASD  | Toal F            | 2010  | Psychol Med 40(7): 1171-81                                                 | 65<br>39<br>26 | 56/9<br>35/4<br>21/5 | 31±10<br>32±12<br>30±8 | 1.5 | -   | 8   | SPM2     |
| 26 | ASD  | Boddaert N        | 2004  | Neuroimage 23(1): 364-9                                                    | 21             | 16/5                 | 9.3±2.2                | 1.5 | 1.2 | 12  | SPM99    |
| 27 | ASD  | Bonilha L         | 2008  | Brain Dev 30(6): 396-401                                                   | 12             | 12/0                 | 12.4±4                 | 2   | -   | 10  | SPM5     |
| 28 | ASD  | Hyde KL           | 2010  | Human Brain Map 31(4): 556-66                                              | 15             | 15/0                 | 22.7±6.4               | 3   | -   | 12  | CIVET    |
| 29 | ASD  | Waiter GD         | 2005  | Neuroimage 24(2): 455-61                                                   | 15             | 15/0                 | 15.2±2.2               | 1.5 | -   | 8   | SPM2     |
| 30 | ASD  | Ke X              | 2008  | Neuroreport 19(9): 921-5                                                   | 17             | 14/3                 | 8.88±1.96              | 1.5 | 2   | 8   | SPM5     |
| 31 | OCSD | Neuner I          | 2010  | NeuroImage 51(3): 1184-93                                                  | 28             | 20/8                 | 30.05±10.78            | 1.5 | 2   | -   | FMRIB    |
| 32 | OCSD | Chamberlain SR    | 2010  | Arch Gen Psychiatry 67(9):965-71                                           | 18             | 1/17                 | 37.39±11.65            | 1.5 | 4   | -   | FMRIB    |
| 33 | OCSD | Qing Fan          | 2012  | PLoS ONE 7(4): e35889                                                      | 27             | 17/10                | 25.5±7                 | 1.5 | 5   | 6   | SPM8     |
| 34 | OCSD | Nakamae T         | 2008  | Progress in Neuro-Psychopharmacology & Biological Psychiatry 32: 1221-226  | 15             | 9/6                  | 29.7±6.9               | 1.5 | -   | -   | SPM2     |
| 35 | OCSD | Szeszko PR        | 2005  | Arch Gen Psychiatry 62: 782-790                                            | 15             | 10/5                 | 38.5±10.9              | 1.5 | 5   | -   | FSL      |
| 36 | OCSD | Lazaro L          | 2011  | Progress in Neuro-Psychopharmacology & Biological Psychiatry 35: 1863-1869 | 27             | 15/12                | 15.6±1.5               | 1.5 | 1.5 | 12  | SPM5     |
| 37 | OCSD | Lazaro L          | 2009  | Psychiatry Research: Neuroimaging 172: 140-146                             | 15             | 8/7                  | 13.7±2.5               | 1.5 | 1.5 | 12  | SPM5     |
| 38 | OCSD | Duran FL          | 2009  | Neuroscience Letters 452: 68-71                                            | 19             | 10/9                 | 32.7±8.8               | 1.5 | 1.2 | 12  | SPM      |
| 39 | OCSD | Van Den Heuvel OA | 2009  | Brain: a journal of neurology 132: 853-868                                 | 55             | 16/39                | 33.7±9.19              | 1.5 | 1.5 | 12  | SPM5     |
| 40 | OCSD | Carmona S         | 2007  | Neuroscience Letters 421: 218-223                                          | 18             | 13/5                 | 12.86±2.76             | 1.5 | 2   | 8   | SPM2     |
| 41 | SCZD | Oertel-Knöchel V  | 2012  | Schizophrenia Research 138: 120-127                                        | 31             | 16/15                | 38 ±11.24              | 3   | 1   | 8   | SPM8     |
| 42 | SCZD | Chua SE           | 2007  | Schizophrenia Research 89: 12-21                                           | 29             | 12/17                | 32±10                  | 1.5 | 3   | 4.4 | BAMM     |
| 43 | SCZD | Ananth H          | 2002  | Am Journ Psychiatry 159(9): 1497-505                                       | 20             | 10/10                | 37.8±9.5               | 2   | 1.5 | 8   | SPM99    |
| 44 | ASD  | Brieber S         | 2007  | Jou Child Psychol Psychiatry 48(12):1251-8                                 | 15             | -                    | 14.2±1.9               | 1.5 | -   | 12  | SPM2     |
| 45 | ASD  | Rojas DC          | 2006  | BMC Psychiatry 6: 56                                                       | 24             | 24/0                 | 22.6±11.61             | 1.5 | -   | 8   | SPM2     |
| 46 | ASD  | Waiter GD         | 2004  | Neuroimage 22(2): 619-25                                                   | 16             | 16/0                 | 15.4±2.24              | 1.5 | -   | 8   | SPM2     |
| 47 | ASD  | Salmond CH        | 2005  | Eur Jour Neurosci 22(3): 764-72                                            | 14             | 13/1                 | 12.9±0.7               | 1.5 | -   | 12  | SPM99    |
| 48 | ASD  | Calderoni S       | 2011  | Neuroimage 59(2): 1013-22                                                  | 38             | 0/38                 | 4.4±1.5                | 1.5 | 1   | 8   | SPM8     |
| 49 | ASD  | Schmitz N         | 2006  | Biol Psychiatry 59(1): 7-16                                                | 8              | 8/0                  | 38±9                   | 1.5 | -   | 10  | SPM99    |
| 50 | OCSD | Ludolph AG        | 2006  | British Journal of Psychiatry 188: 484-485                                 | 14             | 14/0                 | 12.5                   | 1.5 | -   | -   | SPM2     |

|    |      |                      |       |                                                         |          |              |            |     |      |     |                           |
|----|------|----------------------|-------|---------------------------------------------------------|----------|--------------|------------|-----|------|-----|---------------------------|
| 51 | OCSD | Garraux G            | 2006  | Ann Neurol 59: 381-385                                  | 31       | 25/6         | 32±10.5    | 3   | 1.3  | 8   | SPM2                      |
| 52 | OCSD | Zarei M              | 2011  | BIOL PSYCHIATRY 70: 1083-1090                           | 26       | 14/12        | 16.6±1.5   | 1.5 | 1    | 3   | FMRIB                     |
| 53 | OCSD | Christian JC         | 2008  | Psychiatry Research: Neuroimaging 164: 123-131          | 21       | 15/6         | 38±9.6     | 1.5 | 1.5  | 8   | SPM2                      |
| 54 | OCSD | Szeszko PR           | 2008  | Am Jour Psychiatry 165: 1299-1307                       | 37       | 14/23        | 13±2.7     | 1.5 | 1.5  | 8   | SPM2                      |
| 55 | OCSD | Gilbert AR           | 2008a | Journal of Affective Disorders 109: 117-126             | 25       | 13/12        | 37.5±10.7  | 1.5 | 1.5  | 12  | SPM5                      |
| 56 | OCSD | Gilbert AR           | 2008b | Neuroscience Letters 435: 45-50                         | 10       | 6/4          | 12.9±2.7   | 1.5 | 1.5  | 8   | SPM2                      |
| 57 | OCSD | Yoo SY               | 2008  | Journ Korean Med Sci 23: 24-30                          | 71       | 47/24        | 26.61±7.5  | 1.5 | -    | 12  | SPM2                      |
| 58 | OCSD | Valente AA           | 2005  | BIOL PSYCHIATRY 58: 479-487                             | 19       | 10/9         | 32.7±8.8   | 1.5 | 1.2  | 8   | SPM2                      |
| 59 | SCZD | Yüksel C             | 2012  | Schizophrenia Research 138: 177-182                     | 43       | 28/15        | 38.7±10.6  | 3   | 1.33 | 12  | FSL-VBM                   |
| 60 | SCZD | Horacek J            | 2011  | The World Journal of Biological Psychiatry 13(7): 501-9 | 44       | 22/22        | 30.82±9.76 | 1.5 |      | 8   | SPM5                      |
| 61 | SCZD | Aleksic B            | 2012  | Schizophrenia Bulletin 39(3):720-8                      | 100      | 53/47        | 38.3±13    | 1.5 | 1.4  | 12  | SPM5                      |
| 62 | ASD  | Kwon H               | 2004  | Dev Med Child Neurol 46(11): 760-4                      | 11       | 11/0         | 13.6±2.4   | 3   | -    | -   | SPM99                     |
| 63 | ASD  | McAlonan GM          | 2008  | Jou Child Psychol Psychiatry 49(12): 1287-95            | 17<br>16 | 14/3<br>14/2 | 7-16       | 1.5 | 3    | 4.4 | BAMM on SPARC workstation |
| 64 | ASD  | Kurth F              | 2011  | Biol Psychiatry 70(3): 278-82                           | 52       | 38/14        | 11.2±3.95  | 1.5 | 1.2  | 8   | SPM8                      |
| 65 | SCZD | Federspiel A         | 2006  | Neurobiol Dis 22: 702-709                               | 12       | 8/4          | 23.4±3     | 1.5 | -    | 7.5 | -                         |
| 66 | ASD  | Salmond CH           | 2007  | Cortex 43(6): 686-99                                    | 26       | -            | 8-18       | 1.5 | -    | 12  | SPM99                     |
| 67 | ASD  | Wilson LB            | 2009  | Psychiatry Research 174(2): 138-145                     | 10       | 8/2          | 30.1±9.18  | 1.5 | 1.7  | -   | SPM2                      |
| 68 | SCZD | Shin YW              | 2006  | Neuroimage 30(4): 1285-91                               | 19       | 11/8         | 27.84±4.78 | 1.5 | -    | -   | SPM2                      |
| 69 | ASD  | Kosaka H             | 2010  | Neuroimage 50(4): 1357-63                               | 32       | 30/2         | 23.8±4.2   | 3   | -    | -   | SPM5                      |
| 70 | ASD  | Riva D               | 2011  | AJNR Am Jou Neuroradio 32(8): 1430-5                    | 21       | 13/8         | 6.6±2.5    | 1.5 | -    | 8   | SPM5                      |
| 71 | OCSD | Wittfoth M           | 2012  | BMC Neuroscience 13: 17                                 | 29       | 29/0         | 30.7±9     | 1.5 | -    | 8   | SPM8                      |
| 72 | OCSD | Matsumoto R          | 2010  | Psychiatry and Clinical Neurosciences 64: 541-547       | 16       | 7/9          | 32.8±7.5   | 1.5 | 1    | 12  | SPM5                      |
| 73 | OCSD | Koprivová J          | 2009  | Neuroscience Letters 464: 62-66                         | 14       | 5/9          | 28.6±6.1   | 3   | -    | 10  | SPM5                      |
| 74 | OCSD | Cecconi JP           | 2008  | Neuroscience Letters 447: 138-142                       | 5        | 2/3          | 35±11.07   | 1.5 | 1.56 | 8   | SPM2                      |
| 75 | SCZD | Ferri F              | 2012  | Neuropsychologia 50: 988-996                            | 19       | 14/5         | 27.2±5.4   | 1.5 | -    | 8   | SPM8                      |
| 76 | SCZD | Chow EWC             | 2011  | Am J Psychiatry 168(5): 522-529                         | 29       | 11/18        | 30.7±8.5   | 1.5 | 1.5  | 12  | SPM5                      |
| 77 | SCZD | Donohoe G            | 2010  | NeuroImage 54(3):2132-7                                 | 70       | 46/24        | 40.44±11.7 | 1.5 | 1    | 8   | SPM5                      |
| 78 | SCZD | Venkatasubramanian G | 2010  | Indian J Psychiatry 52: 28-36                           | 30       | 21/9         | 30.1±8.3   | 1.5 | 1    | 8   | SPM2                      |
| 79 | SCZD | Pomarol-Clotet E     | 2010  | Molecular Psychiatry 15: 823-830                        | 32       | 21/11        | 41.56±8.79 | 1.5 | -    | 4   | FSL-VBM                   |

|     |      |                  |      |                                                                        |     |        |             |     |      |    |           |
|-----|------|------------------|------|------------------------------------------------------------------------|-----|--------|-------------|-----|------|----|-----------|
| 80  | SCZD | Euler M          | 2009 | Schizophr Res 115(1) :1-7                                              | 20  | 18/2   | 43.26±10.5  | 1.5 | 1.5  | 12 | SPM5      |
| 81  | SCZD | Voormolen EH     | 2010 | Neuroimage 49(1):587-96                                                | 14  | 7/7    | 28±6.4      | 1.5 | -    | 12 | SPM5      |
| 82  | SCZD | Horn H           | 2010 | Psychiatric Research: Neuroimaging 182: 183-186                        | 20  | 13/7   | 30.1±10     | 1.5 | 1    | 10 | SPM5      |
| 83  | SCZD | Lui S            | 2009 | American Jour Psychiatry 166 (2): 196-205                              | 68  | 30/38  | 24.2±8.6    | 3   | 1    | 8  | SPM2      |
| 84  | SCZD | Voets NL         | 2008 | NeuroImage 43(4): 665-75                                               | 25  | 18/7   | 16±1.4      | 1.5 | -    | 8  | FSL       |
| 85  | SCZD | Meda SA          | 2008 | Schizophr Res 101(1-3): 95-105                                         | 200 | 112/88 | 39.69±12.06 | 1.5 | 1.5  | 8  | SPM2      |
| 86  | SCZD | Xu L             | 2009 | Hum Brain Mapp. 30(3): 711-724                                         | 120 | 69/51  | 42.1±12.9   | 1.5 | 1.5  | 12 | SPM5      |
| 87  | SCZD | Shaufelberger MS | 2007 | British Journal of Psychiatry 191: s117-s122                           | 62  | 44/18  | 27.6±8      | 1.5 | -    | 8  | SPM2      |
| 88  | SCZD | Garcia-Marti G   | 2008 | Progress in Neuro-Psychopharmacology & Biological Psychiatry 32: 72-80 | 17  | 17/0   | 35.71±6.11  | 1.5 | 1.25 | 12 | SPM2      |
| 89  | SCZD | Douaud G         | 2007 | Brain; 2007 Sep; 130(Pt 9):2375-86                                     | 25  | 18/7   | 13-18       | 1.5 | 1    | 8  | FSL FMRIB |
| 90  | SCZD | Marti-Bonmati L  | 2007 | Radiology: Volume 244: Number 2 August 2007                            | 21  | -      | 39±10       | 1.5 | 1.25 | 8  | SPM2      |
| 91  | SCZD | Kubicki M        | 2002 | Neuroimage. 2002 December; 17(4): 1711-1719.                           | 16  | 14/2   | 26±7.5      | 1.5 | -    | 12 | SPM99     |
| 92  | SCZD | Janssen J        | 2008 | J. Am. Acad. Chil Adolesc. Psychiatry 47(11):1311-20                   | 25  | 19/6   | 15.4±1.8    | 1.5 | 1.5  | 12 | SPM2      |
| 93  | SCZD | Tang J           | 2012 | PlosOne 7: e40247                                                      | 29  | 16/13  | 16.5±0.9    | 1.5 | 1.8  | 8  | SPM5      |
| 94  | SCZD | Benoit A         | 2012 | Front Psychiatry 3: 42                                                 | 16  | 13/3   | 24.2±4,3    | 1.5 | 1    | 10 | VBM8      |
| 95  | SCZD | Shergill SS      | 2007 | American Journ of Psychiatry 164(3): 467-73                            | 33  | 30/3   | 32±10       | 1.5 | -    | 4  | FMRIB     |
| 96  | SCZD | Rametti G        | 2010 | Schizophrenia Research 121: 66-74                                      | 23  | 11/12  | 32.1±7.1    | 1.5 | 1.5  | 8  | SPM5      |
| 97  | SCZD | Herbsman T       | 2010 | Schizophr Research 116(1): 99-100                                      | 13  | -      | 37.4        | 3   | 3    | -  | FSL       |
| 98  | SCZD | Knöchel C        | 2011 | Neuroimage 59(2): 926-34                                               | 16  | 9/7    | 37.57±7.84  | 3   | 1    | -  | FSL       |
| 99  | SCZD | Pagsberg AK      | 2007 | Journal of Neural Transmission 114: 489-498                            | 29  | -      | 15.7±1.8    | 1.5 | -    | 12 | SPM99     |
| 100 | SCZD | Hubl D           | 2004 | Arch Gen Psychiatry 61(7): 658-68                                      | 13  | 8/5    | 33.8±1.5    | 1.5 | 1.2  | -  | -         |
|     |      |                  |      |                                                                        | 13  | 8/5    | 31±9.3      | 1.5 | 1.2  | -  | -         |
| 101 | SCZD | Szeszko PR       | 2005 | American Journ of Psychiatry 162(3): 602-5                             | 10  | 6/4    | 26.9±4.6    | 1.5 | 1.5  | 3  | FSL       |
| 102 | SCZD | Buchsbaum MS     | 2006 | Biol Psychiatry 60(11): 1181-7                                         | 63  | 44/19  | 41.7±12.5   | 3   | 3    | -  | AIR5.1    |
| 103 | SCZD | Hao Y            | 2006 | NeuroReport 17(1): 23-26                                               | 21  | 12/9   | 23.71±5.47  | 1.5 | 4    | 8  | SPM2      |
| 104 | SCZD | Ashtari M        | 2007 | Arch Gen Psychiatry 64(11): 1270-80                                    | 23  | 13/10  | 15.8±1.9    | 1.5 | 2.5  | -  | DTISudio  |
| 105 | SCZD | Manoach DS       | 2007 | Neuroimage 37(2): 599-610                                              | 17  | 13/4   | 41±12       | 3   | 2    | -  | -         |
| 106 | SCZD | Mori T           | 2007 | Psychiatry Research 154(2): 133-45                                     | 42  | 26/16  | 40±9.3      | 1.5 | 1.23 | -  | SPM2      |
| 107 | SCZD | Schlösser RG     | 2007 | Schizophrenia Research 89(1-3): 1-11                                   | 18  | 14/4   | 29.6±7      | 1.5 | 3    | 8  | SPM2      |
| 108 | SCZD | Cheung V         | 2008 | Psychological Medicine 38(6): 877-85                                   | 25  | 11/14  | 18-45       | 1.5 | 3    | 6  | SPM2      |

|     |      |                    |      |                                                   |     |        |             |             |       |    |                |
|-----|------|--------------------|------|---------------------------------------------------|-----|--------|-------------|-------------|-------|----|----------------|
| 109 | SCZD | Kyriakopoulos M    | 2008 | Biol Psychiatry 63(5): 519-23                     | 19  | 12/7   | 17.09±1.69  | 1.5         | 2.5   | 4  | SPM2           |
| 110 | SCZD | Bai YM             | 2009 | Schizophrenia Research 109 (2009): 167-181        | 20  | 5/15   | 40.5±9.3    | 1.5         | 2.2   | 8  | SPM2           |
| 111 | SCZD | Hao Y              | 2009 | Schizophrenia Research 114(1-3): 128-35           | 34  | 20/14  | 25.44±5.90  | 1.5         | 4     | 8  | SPM2           |
| 112 | SCZD | Hashimoto R        | 2009 | World Journ Biolog Psychiatry 10(1): 65-9         | 42  | 26/16  | 40±9.3      | 1.5         | 1.23  | 6  | MATHLAB<br>6.5 |
| 113 | SCZD | Kanaan R           | 2009 | British Journal Psychiatry 194(3): 236-242        | 76  | 66/10  | 30.9±10.2   | 1.5         | 2.5   | 8  | SPM2           |
| 114 | SCZD | Rotarska-Jagiela A | 2008 | NeuroImage 9(4): 1522-1532                        | 24  | 12/12  | 39±9.35     | 3           | -     | -  | -              |
| 115 | SCZD | Sussmann JE        | 2009 | Bipolar Disorders 11(1): 11-18                    | 28  | 15/13  | 38±9.9      | 1.5         | 2.8   | 8  | SPM2           |
| 116 | SCZD | Chan WY            | 2010 | Schizophrenia Research 119 (1-3): 52-60           | 39  | 30/9   | 28.8±6.8    | 3           | 0.9   | -  | SPM5           |
| 117 | SCZD | Perez-Iglesias R   | 2010 | Am J Psychiatry 167(4): 451-8                     | 49  | -      | -           | 1.5         | 1.5   | 4  | SPM2           |
| 118 | SCZD | Tang J             | 2010 | Brain Research 9 July 2010, Pages 199-205         | 38  | 20/18  | 16.3±1      | 1.5         | 4     | 8  | SPM5           |
| 119 | SCZD | Nakamura K         | 2012 | Psychiatry Research: Neuroimaging 202(3): 233-238 | 58  | 38/20  | 27.6±6.9    | 1.5         | 5     | -  | SPM2           |
| 120 | SCZD | Sugranyes G        | 2012 | Schizophrenia Research 138(2-3): 136-142          | 22  | 14/8   | 17.1±1.5    | 1.5         | -     | -  | SPM5           |
| 121 | SCZD | Cui L              | 2011 | Psychiatry Research: Neuroimaging 194: 347-353    | 25  | 16/9   | 25.8±6      | 3           | -     | -  | SPM2           |
| 122 | SCZD | Colombo RR         | 2012 | Psychiatry Res 2012 202(3): 198-205               | 62  | 45/17  | 27.74±8     | 1.5         | -     | 12 | SPM2           |
| 123 | SCZD | Hulshoff Pol HE    | 2004 | NeuroImage 21: 27-35                              | 159 | 112/47 | 35.6±12.4   | 1.5         | 1.2   | 8  | -              |
| 124 | SCZD | Honea RA           | 2008 | Biological Psychiatry (2008) 63 465-474           | 169 | 132/37 | 36.39±9.46  | 1.5         | 1.5   | 8  | SPM2           |
| 125 | SCZD | Kawasaki Y         | 2004 | Eur Arch Psychiatry Clin Neurosci 254: 406-414    | 25  | 14/11  | 25.8±4.5    | 1.5         | 1     | 12 | SPM99          |
| 126 | SCZD | Manè A             | 2009 | Schizophrenia Research 114: 136-143               | 15  | 12/3   | 25.56±5.77  | 1.5         | -     | -  | SPM5           |
| 127 | SCZD | Hulshoff Pol HE    | 2001 | Arch Gen Psychiatry 58: 1118-1125                 | 159 | 112/47 | 35.6±12.4   | 1.5         | 1.2   | 8  | -              |
| 128 | SCZD | Van Haren NEM      | 2007 | Neuropsychopharmacology 32: 2057-2066             | 96  | 70/26  | 32.22±11.10 | 1.5         | -     | 8  | -              |
| 129 | SCZD | Shiffer B          | 2010 | Brain: A Journal of Neurology 133: 3093-3103      | 24  | 24/0   | 37.55±8.45  | 1.5         | 1     | 14 | SPM5           |
| 130 | SCZD | Segall JM          | 2009 | Schizophrenia Bulletin 35(1): 82-95               | 266 | 167/99 | 33.7±11.7   | MULTICENTRE |       |    |                |
| 131 | SCZD | Cooke MA           | 2008 | Schizophrenia Research 103: 40-51                 | 52  | 40/12  | 38.35±9.89  | 1.5         | 5     | 8  | SPM2           |
| 132 | SCZD | Prasad KMR         | 2007 | Molecular Psychiatry 12: 105-113                  | 30  | 23/7   | 24.66±7.71  | 1.5         | 1.5   | 12 | SPM2           |
| 133 | SCZD | Koo MS             | 2006 | Arch Gen Psychiatry 63: 1090-1100                 | 30  | 0/30   | 29.8±9.4    | 1.5         | 1.5   | 8  | SPM2           |
| 134 | SCZD | Nenadic I          | 2011 | Schizophr Bull 38(4): 838-44                      | 99  | 57/42  | 36.2±11.2   | 1.5         | 1x1x1 | -  | SPM2           |
| 135 | SCZD | Bonilha L          | 2008 | Schizophr Res 101(1-3):142-51                     | 14  | 11/3   | 40±7        | 3           | 1     | 10 | SPM5           |
| 136 | SCZD | Kyriakopoulos M    | 2009 | The British Journal of Psychiatry 195(4): 346-353 | 17  | 13/4   | 16.62±1.28  | 1.5         | 2.5   | 4  | SPM2           |
|     |      |                    |      |                                                   | 17  | 13/4   | 23.85 ±4.83 | 1.5         |       | 4  | SPM2           |
| 137 | ASD  | Ecker C            | 2012 | Arch Gen Psychiatry 69(2): 195-209                | 89  | 89/0   | 26±7        | 3           | 1     | 3  | FSL 4.0        |



|     |      |               |       |                                                      |                |                      |                                |             |                   |             |                               |
|-----|------|---------------|-------|------------------------------------------------------|----------------|----------------------|--------------------------------|-------------|-------------------|-------------|-------------------------------|
| 138 | ASD  | Greimel E     | 2013  | Brain Struct Funct 218: 929-942                      | 47             | 47/0                 | 21.4±10.1                      | 1.5         | -                 | 8           | SPM5                          |
| 139 | ASD  | Riva D        | 2013  | Cerebellum 12: 676-685                               | 26             | 23/3                 | 5.10±2.6                       | 1.5         | 5                 | 8           | SPM8                          |
| 140 | ASD  | Radeloff D    | 2014  | Plos One 9(9): e106539                               | 34             | 31/3                 | 19.06±5.12                     | 3           | 1                 | 8           | SPM8                          |
| 141 | ASD  | D'Mello AM    | 2015  | NeuroImage Clinical 7: 631-9                         | 35             | 30/5                 | 10.4 ± 1.6                     | 3           | -                 | 8           | SPM8                          |
| 142 | ASD  | Foster NE     | 2015  | Pediatr Neurol 53(4): 350-9                          | 38             | 38/0                 | 12.4±2.4                       | 3           | -                 | 8           | CIVET                         |
| 143 | ASD  | Osipowicz K   | 2015  | Autism Res 8(4): 379-85                              | 531            | 430/101              | 7-64                           | -           | -                 | 8           | SPM8                          |
| 144 | ASD  | Eilam-Stock T | 2016  | Front Neurosci 10: 237                               | 66             | 60/6                 | 27±8                           | -           | -                 | 8           | SPM8                          |
| 145 | OCSD | Cheng B       | 2016  | Front Behav Neurosci 10: 141                         | 30             | 18/22                | 10.8±1.2                       | 3           | 1x1.25x2          | 8           | SPM8                          |
| 146 | OCSD | Chen J        | 2013  | Psychiatry Res 213(1): 11-7                          | 8              | 4/4                  | 11.7±2.7                       | 3           | 0.5x0.5x1         | 8           | SPM8                          |
| 147 | OCSD | de Wit SJ     | 2014  | Am J Psychiatry 171(3): 340-9                        | 412            | 202/210              | 32.10±9.6                      | 1.5         | -                 | 10          | SPM8                          |
| 148 | OCSD | Hashimoto N   | 2014  | Neuropsychiatr Dis Treat 10: 1987-96                 | 24<br>15       | 11/13<br>7/8         | 35.70±7.2<br>32.50±7.7         | 1.5<br>1.5  | 1x1x1<br>1x1x1    | 8<br>8      | SPM8<br>SPM8                  |
| 149 | OCSD | Hou J         | 2013  | PLoS One 8(12): e83931                               | 33             | 18/15                | 25.30±9.6                      | 3           | 1x1x1             | 8           | SPM8                          |
| 150 | OCSD | Huysen C      | 2013  | World J Biol Psychiatry. 14(4): 319-31               | 29             | 11/18                | 13.78±2.58                     | 3           | 1x1x1.2           | 8           | SPM8                          |
| 151 | OCSD | Kobayashi T   | 2015  | Magn Reson Med Sci 14(4): 329-35                     | 20             | 10/10                | 34.1±8.5                       | 3           | 1.5x1.5x1.5       | 8           | SPM8                          |
| 152 | OCSD | Lazaro L      | 2014a | Prog Neuropsychopharmacol Biol Psychiatry 54: 249-58 | 62             | 36/26                | 15.4±2.1                       | 3           | 1x1x1             | 8           | SPM8                          |
| 153 | OCSD | Okada K       | 2015  | Psychiatry Clin Neurosci 69(7): 411-21               | 37             | 14/23                | 34.4±10.5                      | 3           | 1                 | 8           | SPM8                          |
| 154 | OCSD | Park SE       | 2015  | Psychiatry Clin Neurosci 69(11): 717-23              | 14             | 9/5                  | 28.9±7.2                       | 3           | 1                 | 8           | SPM8                          |
| 155 | OCSD | Subira M      | 2013  | PLoS One 8(9): e75273                                | 65<br>30       | 29/36<br>20/10       | 34.6±9.43<br>32.23±9.05        | 1.5<br>1.5  | 1.2<br>1.2        | 8<br>8      | SPM8<br>SPM8                  |
| 156 | OCSD | Subira M      | 2015  | J Psychiatry Neurosci 40(4): 232-40                  | 71             | 35/36                | 32.11±8.45                     | 1.5         | 1                 | 10          | SPM8                          |
| 157 | OCSD | Tan L         | 2013  | Neurosci Bull 29(5): 642-8                           | 28             | 19/9                 | 25.35±7.24                     | 1.5         | 1                 | 8           | SPM5                          |
| 158 | OCSD | Tang W        | 2013  | Prog Neuropsychopharmacol Biol Psychiatry 46: 126-31 | 18             | 11/7                 | 25.5±6.7                       | 3           | 1                 | -           | SPM8                          |
| 159 | OCSD | Tang W        | 2015  | Behav Brain Res 294: 72-80                           | 26             | 15/11                | 25.5±4.9                       | 3           | 1                 | -           | SPM8                          |
| 160 | OCSD | Tang W        | 2016  | Behav Brain Res 313: 17-22                           | 18             | 11/7                 | 27.3±10.4                      | 3           | 1.8               | 4           | SPM8                          |
| 161 | SCZD | Amann BL      | 2016  | Acta Psychiatr Scand 133(1): 23-33                   | 45<br>45       | 26/19<br>26/19       | 43.2±9.1<br>43.2±9             | 1.5<br>1.5  | 1<br>1            | -<br>-      | FSL-VBM<br>FSL-VBM            |
| 162 | SCZD | Anderson VM   | 2015  | Int J Neuropsychopharmacol 18(7): pyv016.            | 18<br>19<br>15 | 14/4<br>14/5<br>13/2 | 32.2±7.9<br>33.3±8<br>34.3±7.1 | 3<br>3<br>3 | 0.8<br>0.8<br>0.8 | -<br>-<br>- | FSL-VBM<br>FSL-VBM<br>FSL-VBM |
| 163 | SCZD | Chen Z        | 2014  | Psychol Med 44(12): 2489-501                         | 86             | 47/39                | 24.52±0.91                     | 3           | 1                 | 6           | SPM2                          |
| 164 | SCZD | Filippi M     | 2014  | AJNR Am J Neuroradiol 35(1): 30-7                    | 43             | 24/19                | 29.3±7.4                       | 1.5         | 1                 | 8           | SPM8                          |
| 165 | SCZD | Frascarelli M | 2015  | Psychiatry Res 231(2): 103-10                        | 18             | 8/10                 | 29.2±8.6                       | 3           | 1                 | 8           | SPM8                          |

|     |      |                  |       |                                                       |          |                |                          |             |        |        |              |
|-----|------|------------------|-------|-------------------------------------------------------|----------|----------------|--------------------------|-------------|--------|--------|--------------|
|     |      |                  |       |                                                       | 15       | 9/6            | 42.7±7.4                 |             |        |        |              |
| 166 | SCZD | Fukuta H         | 2013  | Psychiatry Clin Neurosci 67(1): 3-11                  | 40       | 0/40           | 45.6±8.1                 | 1.5         | 1.5    | 12     | SPM8         |
| 167 | SCZD | Guo Q            | 2014  | Schizophr Res 160(1-3): 57-66                         | 19       | 3/16           | 23.95±7.49               | 3           | 1      | 6      | SPM8         |
| 168 | SCZD | Guo W            | 2015  | Medicine (Baltimore) 94(42): e1493                    | 49       | 30/19          | 22.69±4.62               | 1.3         | -      | -      | SPM8         |
| 169 | SCZD | Huang P          | 2015  | Sci Rep 5: 14505                                      | 18<br>18 | 10/8<br>9/9    | 22.56±6.73<br>22.67±3.85 | 3           | 1      | 8      | SPM8         |
| 170 | SCZD | Kim GW           | 2015  | Neuroreport 26(18): 1095-100                          | 20       | 12/8           | 30±1                     | 3           | 1      | 6      | SPM8         |
| 171 | SCZD | Kong L           | 2014  | Psychiatry Res 231(2): 176-83                         | 22       | 16/6           | 53.95±8.53               | 3           | 1      | 8      | SPM8         |
| 172 | SCZD | Lei W            | 2015a | Psychiatry Res 234(2): 219-26                         | 88<br>44 | 52/36<br>26/18 | 23.04±6.94<br>22.91±6.89 | 3<br>3      | 1<br>1 | 6<br>6 | SPM8<br>SPM8 |
| 173 | SCZD | Lei W            | 2015b | Sci Rep 5: 12994                                      | 33       | 22/11          | 22.33±6.9                | 3           | 1      | 6      | SPM8         |
| 174 | SCZD | Liao J           | 2015  | J Psychiatr Res 65: 80-6                              | 93       | 57/36          | 27±6.6                   | 3           | 1      | 8      | SPM8         |
| 175 | SCZD | Kenneth Martin A | 2014  | Psychiatry Res 224(3): 311-8                          | 26       | -              | -                        | 3           | 0.9    | 8      | SPM8         |
| 176 | SCZD | Nakamura K       | 2013  | Front Psychiatry 4: 16                                | 34       | 20/14          | 13.5±2                   | 1.5         | 1      | 10     | SPM8         |
| 177 | SCZD | Picado M         | 2015  | PLoS One 10(4) :e0126407                              | 20       | 11/9           | 35.9±0.73                | 1.5         | 2      | 12     | SPM8         |
| 178 | SCZD | Poletti S        | 2016  | J Affect Disord 189: 290-7                            | 96       | 67/29          | 37.24±9.33               | 3           | 0.8    | 8      | SPM8         |
| 179 | SCZD | Rose EJ          | 2014  | Am J Med Genet B Neuropsychiatr Genet 165B(6): 467-71 | 163      | 52/111         | 38.51±10.84              | MULTICENTRE |        |        |              |
| 180 | SCZD | Salgado-Pineda P | 2014  | Neuropsychobiology 69(1): 52-8                        | 14       | 9/5            | 37.29±8.87               | 3           | -      | 12     | SPM5         |
| 181 | SCZD | Sans-Sansa B     | 2013  | Schizophr Res 146(1-3): 308-13                        | 31       | 24/7           | 40.71±8.61               | 1.5         | 1      | -      | FSL-VBM      |
| 182 | SCZD | Singh S          | 2014  | Neuroradiology 56(5): 413-22                          | 14       | 8/6            | 34.06±9.89               | 3           | 1      | 10     | SPM8         |
| 183 | SCZD | Singh S          | 2015  | J Biosci 40(2): 355-64                                | 14       | 11/3           | 31.5±9.4                 | 3           | 1      | 10     | SPM8         |
| 184 | SCZD | Song J           | 2015  | Neuropsychiatr Dis Treat 11: 1211-9                   | 71       | 29/42          | 36.6±14.7                | 3           | 1      | 8      | SPM8         |
| 185 | SCZD | Stegmayer K      | 2016  | Cortex 78: 125-37                                     | 45       | 28/17          | 38.24±11.37              | 3           | 1      | 8      | SPM8         |
| 186 | SCZD | Stegmayer K      | 2014  | Psychiatry Res 223(1): 49-51                          | 46       | 29/17          | 34.7±11.5                | 3           | 1      | 8      | SPM8         |
| 187 | SCZD | Suazo V          | 2014  | Psychiatry Clin Neurosci 68(3): 206-15                | 17       | 10/7           | 33.29±10.48              | 1.5         | 1.5    | -      | SPM8         |
| 188 | SCZD | Torres US        | 2016  | Neuroimage Clin 12: 1-15                              | 161      | 111/50         | 30.4±8.3                 | MULTICENTRE |        |        |              |
| 189 | SCZD | Vijayakumari AA  | 2015  | Clin Psychopharmacol Neurosci 13(1): 68-82            | 41       | 29/12          | 27.34±7.48               | 3           | 1      | 8      | SPM8         |
| 190 | SCZD | Yao L            | 2014  | MAGMA 27(4): 283-90                                   | 68       | 30/38          | 24.2±8.6                 | 3           | 1      | 4      | SPM8         |
| 191 | SCZD | Yue Y            | 2016  | PLoS One 11(1): e0147204                              | 20       | 10/10          | 24.45±5.51               | 3           | 1      | 8      | SPM8         |
| 192 | SCZD | Zhang Y          | 2015  | Schizophr Res 168(1-2): 353-9                         | 37       | 17/20          | 15.5±1.8                 | 3           | 1      | 8      | SPM8         |
| 193 | SCZD | Horacek J        | 2012  | World J Biol Psychiatry 13(7): 501-9                  | 44       | 22/22          | 30.82±9.76               | 1.5         | 1      | 8      | SPM5         |

|     |      |           |       |                                                                         |          |        |                |        |        |        |                                      |
|-----|------|-----------|-------|-------------------------------------------------------------------------|----------|--------|----------------|--------|--------|--------|--------------------------------------|
| 194 | SCZD | Rigucci S | 2013  | Acta Psychiatr Scand 128(4): 261-70                                     | 19       | 12/7   | 22.2±3.7       | 1.5    | 1      | 6      | SPM8                                 |
| 195 | SCZD | Sarrò S   | 2013  | Br J Psychiatry 203(1): 51-7                                            | 81       | 59/22  | 42.96±9.85     | 1.5    | -      | -      | FSL-VBM                              |
| 196 | SCZD | Wang Q    | 2013  | Psychological Medicine 43(11): 2301-2309                                | 35       | 16/19  | 23.84±6.96     | 3      | 3x3x3  | 6      | SPM8 & DTIstudio                     |
| 197 | SCZD | Situ W    | 2015  | International Journal of Psychiatry in Clinical Practice 19(2): 114-118 | 50       | 50/0   | 31.1±6.48      | 1.5    | 4x4x4  | 8      | SPM2                                 |
| 198 | SCZD | Zhang XY  | 2016  | J Clin Psychiatry 77(2): 205-211                                        | 39       | 16/23  | 28.87±10.22    | 3      | 2.4    | 6      | FSL-FMRIB & SPM8                     |
| 199 | SCZD | Wagner G  | 2015  | Cortex 66: 35-45                                                        | 38       | 25/13  | 35.8±9.9       | 3      | 2.5    | 4      | FSL-FMRIB & SPM8                     |
| 200 | OCSD | Admon R   | 2012  | Psychiatry Res 203(2-3): 207-13                                         | 13       | 10/3   | 25.5±1         | 1.5    | 3      | 8      | Matlab DTItool                       |
| 201 | OCSD | Lazaro L  | 2014b | Depress Anxiety 31(12): 1007-17                                         | 63       | 36/27  | 15.6±2.1       | 3      | 2      | 8      | FSL-FMRIB & SPM8                     |
| 202 | OCSD | Li Z      | 2014  | Med Sci Monit 20: 2275-82                                               | 11<br>11 | -<br>- | 18-65<br>18-65 | 3<br>3 | 3<br>3 | 8<br>8 | FSL-FMRIB & SPM8<br>FSL-FMRIB & SPM8 |
| 203 | OCSD | Gruner P  | 2012  | Neuropsychopharmacology 37(12): 2730-9                                  | 30       | 13/10  | 14.3±2.1       | 3      | 2.5    | 8      | FSL-FMRIB & SPM5                     |

\* The average age (standard deviation) or age range is reported on the basis of what is specified by the authors.

\*\* Where no information was provided, the voxel-size was expressed.

**Table S2.** Description of the total experimental sample with the respective diagnostic labeling.

| <b>SPECTRUM</b> | <b>N</b> | <b>DIAGNOSTIC SUBCATEGORIES (N)*</b>     | <b>MALE/FEMALE**</b> | <b>AGE (MEAN +SD) **</b> |
|-----------------|----------|------------------------------------------|----------------------|--------------------------|
| <b>ASD</b>      | 1719     | 1172 Mixed form                          | 931/200              | 16.858 ± 10.226          |
|                 |          | 200 Primary Autism                       | 172/28               | 15.166 ± 10.625          |
|                 |          | 171 High-functionality                   | 156/15               | 15.363 ± 10.126          |
|                 |          | 134 Asperger                             | 94/25                | 23.483 ± 10.607          |
|                 |          | 42 Pervasive Development Disorder        | 40/2                 | 21.750 ± 10.349          |
| <b>OCSD</b>     | 1738     | 1584 Obsessive-Compulsive Disorder       | 806/43               | 25.871 ± 9.854           |
|                 |          | 136 Tourette Syndrome                    | 120/16               | 28.358 ± 10.272          |
|                 |          | 18 Trichotillomania                      | 1/17                 | 37.39 ± 11.65            |
| <b>SCZD</b>     | 5236     | 3186 Mixed form                          | 1994/1124            | 33.741 ± 9.639           |
|                 |          | 673 Schizophrenia Simplex                | 388/285              | 36.098 ± 9.215           |
|                 |          | 565 First Episode Schizophrenia          | 288/236              | 25.176 ± 9.875           |
|                 |          | 449 First Episode Psychosis              | 240/160              | 23.626 ± 8.900           |
|                 |          | 184 Early Onset Symptoms of Psychosis    | 111/73               | 16.218 ± 9.018           |
|                 |          | 49 Paranoia                              | 28/21                | 32.400 ± 8.950           |
|                 |          | 48 Paranoia with Schizophrenia symptoms  | 26/22                | 35.645 ± 9.522           |
|                 |          | 39 Auditory Hallucination                | 10/8                 | 30.780 ± 8.987           |
|                 |          | 30 Hallucination                         | 25/5                 | 24.755 ± 8.945           |
|                 |          | 13 Acute Psychosis with no hallucination | 8/5                  | 31.000 ± 9.300           |

\* Diagnoses are reported on the basis of what is specified by the authors.

\*\* Values have been calculated on the basis of the studies bearing the required information.

ASD = Autism Spectrum Disorder

OCSD = Obsessive Compulsive Spectrum Disorder

SCZD = Schizophrenia Spectrum Disorder

N = number of subjects from each diagnostic category

**Figure S2.** Statistical distribution of the papers included in the study.

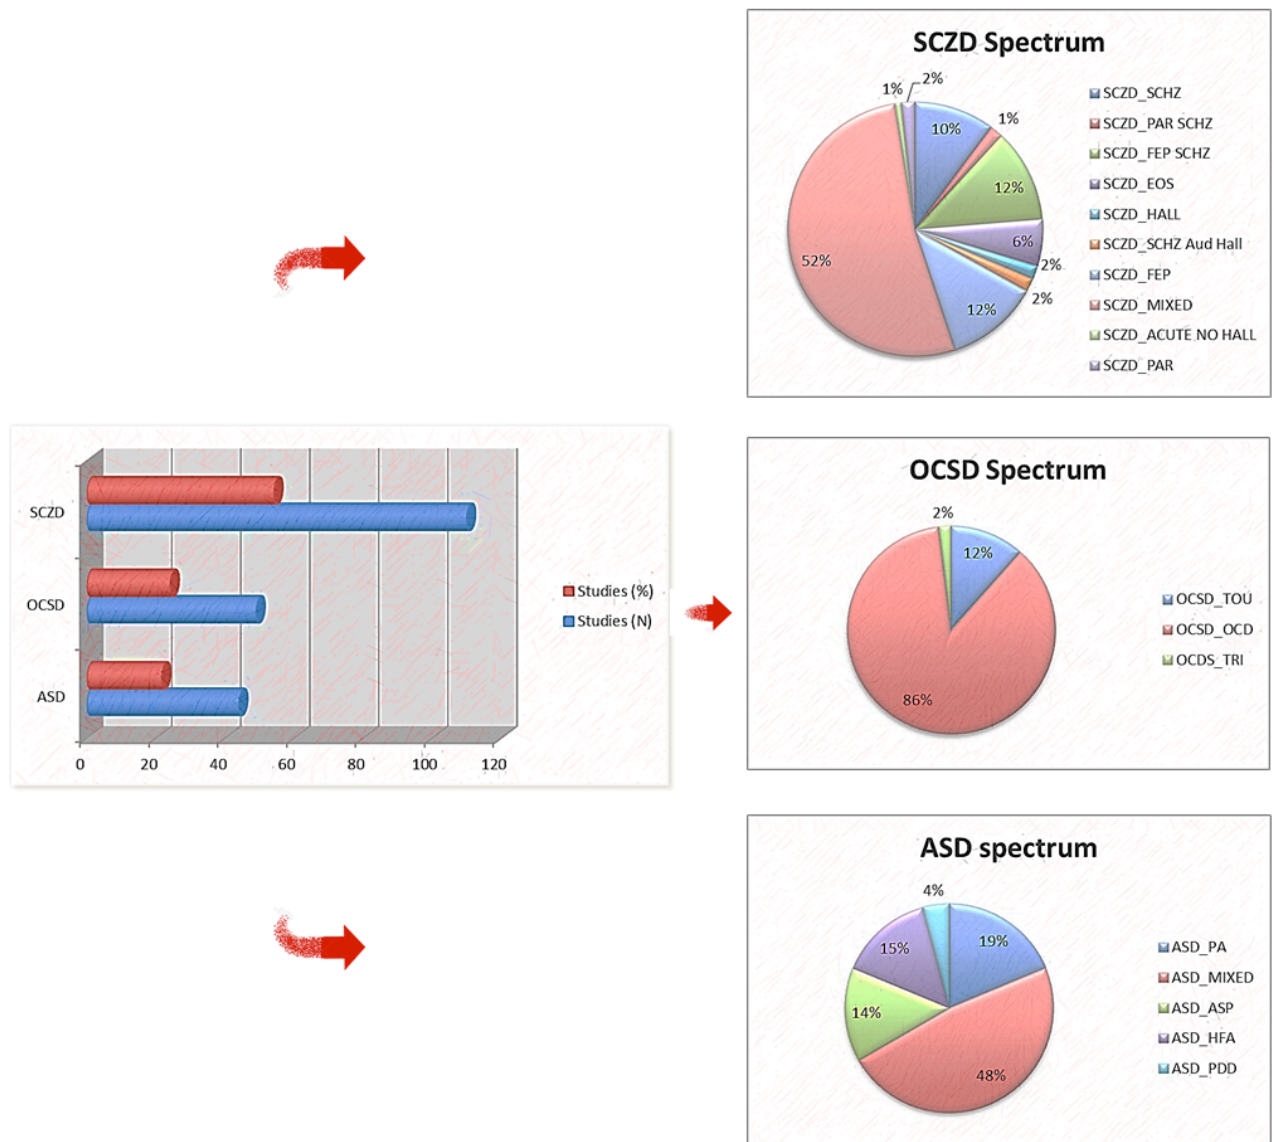

**Legend**

SCZD\_SCHZ = Schizophrenia Simplex; SCZD\_PAR SCHZ = Paranoia with Schizophrenia symptoms; SCZD\_FEP SCHZ = First Episode Schizophrenia; SCZD\_EOS = Early Onset Symptoms of Psychosis; SCZD\_HALL = Hallucination; SCZD\_Aud Hall = Auditory Hallucination; SCZD\_FEP = First Episode Psychosis; SCZD\_MIXED = Mixed form; SCZD\_ACUTE NO HALL = Acute Psychosis with no hallucination; SCZD\_PAR = paranoia; OCSD\_TOU = Tourette Syndrome; OCSD\_OCD = Obsessive-Compulsive Disorder; OCSD\_TRI = Trichotillomania; ASD\_MIXED = Mixed form; ASD\_PA = Primary Autism; ASD\_HFA = High-functionality; ASD\_ASP = Asperger; ASD\_PDD = Pervasive Development Disorder.

**Table S4<sup>2</sup>.** Gray matter (GM) and white matter (WM) variations with relative numbers of foci for each of the selected psychiatric spectra.

| SPECTRUM         | Diagnostic Label                             | Foci (N) | White matter changes |     | Gray matter Changes |      |
|------------------|----------------------------------------------|----------|----------------------|-----|---------------------|------|
|                  |                                              |          | ↑                    | ↓   | ↑                   | ↓    |
| ASD<br>(N=1719)  | <i>Mixed form</i>                            | 312      | 27                   | 66  | 125                 | 94   |
|                  | <i>Primary autism</i>                        | 186      | 7                    | 57  | 93                  | 29   |
|                  | <i>Asperger</i>                              | 54       | 11                   | 14  | 2                   | 27   |
|                  | <i>High-functionality autism</i>             | 53       | 5                    | 20  | 16                  | 12   |
|                  | <i>Pervasive developmental disorder</i>      | 16       | 0                    | 11  | 0                   | 5    |
| OCSD<br>(N=1738) | <i>Obsessive-compulsive disorder</i>         | 364      | 25                   | 77  | 67                  | 195  |
|                  | <i>Tourette syndrome</i>                     | 70       | 13                   | 33  | 5                   | 19   |
|                  | <i>Trichotillomania</i>                      | 4        | 0                    | 4   | 0                   | 0    |
| SCZD<br>(N=5236) | <i>Schizophrenia simplex</i>                 | 190      | 0                    | 4   | 4                   | 182  |
|                  | <i>Paranoia</i>                              | 20       | 0                    | 17  | 1                   | 2    |
|                  | <i>Auditory hallucination</i>                | 34       | 7                    | 0   | 0                   | 27   |
|                  | <i>First episode psychosis</i>               | 92       | 3                    | 45  | 4                   | 40   |
|                  | <i>Mixed form</i>                            | 633      | 18                   | 160 | 22                  | 433  |
|                  | <i>First episode schizophrenia</i>           | 65       | 5                    | 19  | 0                   | 41   |
|                  | <i>Acute psychosis with no hallucination</i> | 21       | 0                    | 21  | 0                   | 0    |
|                  | <i>Early onset symptoms of psychosis</i>     | 52       | 0                    | 8   | 0                   | 44   |
|                  | <i>Hallucination</i>                         | 21       | 0                    | 16  | 0                   | 5    |
|                  | <i>Paranoia with schizophrenia symptoms</i>  | 26       | 0                    | 9   | 1                   | 16   |
|                  | Foci (Total)                                 |          | 121                  | 581 | 340                 | 1171 |
|                  |                                              |          | 702                  |     | 1511                |      |

<sup>2</sup> The items shown in the table are the result of the entire selection process as shown in PRISMA (2009) flow chart and table S2. The starting point for the selection can be traced in the algorithms and in the additional considerations previously proposed.

## *The insular nodes and their resting state functional connectivity*

### **Subjects and image acquisition**

For the anatomical covariance and functional connectivity measures we used the Beijing dataset which has been publicly released within the “1000 Functional Connectomes” Project. This dataset consists of 198 subjects (76 males and 122 female) with age ranging from 18 to 26 years, mean 21.16, SD 1.83, that underwent structural and resting state scans. All subjects were right-handed and had no history of neurological or psychiatric disorders. Written informed consent was obtained from each participant, and the study was approved by the Institutional Review Board of Beijing Normal University Imaging Center for Brain Research.

MRI data were acquired using a SIEMENS TRIO 3-Tesla scanner in the Beijing Normal University Imaging Center for Brain Research. Participants lay supine with their head fixed by straps and foam pads so as to minimize movements. During the resting-state session, participants were instructed to be as still as possible and let their mind roam. Functional images were obtained using an EPI sequence with the following parameters: 33 axial slices, thickness/gap = 3/0.6 mm, in-plane resolution =  $64 \times 64$ , TR = 2000 ms, TE = 30 ms, flip angle =  $90^\circ$ , FOV =  $200 \times 200$  mm. Furthermore, a T1-weighted sagittal three-dimensional magnetization-prepared rapid gradient echo (MPRAGE) sequence was acquired, which covered the entire brain: 128 slices, TR = 2530 ms, TE = 3.39 ms, slice thickness = 1.33 mm, flip angle =  $7^\circ$ , inversion time = 1100 ms, FOV =  $256 \text{ mm} \times 256 \text{ mm}$ , and in-plane resolution =  $256 \times 192$ .

### **Preprocessing**

In order to analyze the functional connectivity of the insula we used the DPABI processing tool rel. 2.3 (Yan, et al., 2016). All the preprocessing was performed by employing the advanced DPARSF module V3.2. The first 10 volumes of the functional images are often discarded both for achieving signal equilibrium and for letting participants adapt to the scanning noise. All volume slices were corrected for different signal acquisition times taking the middle slice as reference and using the odd slice order. Then, the images' time series of every subject were realigned. After the realignment, individual structural images were co-registered to the mean functional image. The transformed structural images were then segmented into GM, WM and CSF. To remove the nuisance signals, we employed the Friston 24-parameter model (Friston, et al., 1996), three translation and three rotation parameters of the current volume and the preceding volume, plus each of these values squared, so as to regress out head motion effects from the realigned data. The signals from both WM and CSF were regressed out to reduce respiratory and cardiac effects. In addition, linear and quadratic trends were also included as regressors, since the BOLD signal exhibits low-frequency drifts. The DARTEL tool was used to transform the functional data from individual native space to MNI space. Spatial smoothing (FWMH kernel: 4.5 mm) was applied to the functional images and temporal filtering (0.01–0.1 Hz) was then performed on the time series. Finally, for every subject the mean time course of every insular ROI was extracted and correlated voxel-wise to all the voxels of the brain. These results were then summarized using a one sample t test. All the calculations were thresholded at a  $p < 0.05$  cluster-level, corrected for multiple comparison using the FSL randomize tool.

## ***Clustering and visualization of alteration patterns***

### **Clustering**

To test if data can be decomposed in two or more groups we employed a clustering approach: the k-means technique. This technique is an unsupervised learning algorithm that subdivides a set of objects in  $k$  groups according to their attributes. There are different types and methods of clustering in literature: we chose k-means because, compared to other algorithms, its runtime and performance are usually more efficient as the number of records increases (Bishop, 2006). Furthermore, since clusters are non-hierarchical, they do not overlap, which is important in our case, as we were looking for a clear partition between the three psychiatric spectra (Bishop, 2006; Thirion, et al., 2014).

For the k-means clustering we used an  $n \times p$  matrix, in which rows correspond to points and columns to variables (attributes). We used as attributes the MA maps and as points the voxels. The optimal number of groups ( $k$ ) was determined by the silhouette plot introduced by Kaufman and Rousseeuw (1990). The results of the silhouette plot showed that 2 was the best number of clusters calculated by this algorithm (Fig. S3).

In this study we applied both clustering and classification methods to analyze our data. The rationales for using the clustering technique as well as the machine learning method are different. We used the clustering technique to check if a “natural” decomposition of the voxels could emerge from each different psychiatric disorder. This allowed us to see whether or not there were interesting anatomical partitions that could differentiate ASD, SCZD, and OCSD.

### **Multidimensional scaling**

To evaluate the similarity between the three different spectra of psychiatric disorders (represented by MA maps generated by the different experiments analyzed in this study) we used the multidimensional scaling (MDS) method. MDS mainly consists of data proximity analysis techniques to check hidden structures. For each paper, every MA map was transformed into a series of vectors containing all the values of the original matrix. Then a representational similarity matrix was constructed by computing the correlation  $r$  among all vectors. Vectors are constituted by the statistical values of the voxels pertaining to the MA maps. The distance matrix (or representational dissimilarity matrix) defined as  $1 - r$  (Cauda, et al., 2014; Kriegeskorte, et al., 2008) was similarly created. The distance matrix was subjected to the multidimensional scaling analysis so as to obtain a geometrical representation of data deviation.

We evaluated the similarity by examining visually the MDS graphs, in which the multidimensional similarity/dissimilarity between pathology-derived MA maps are represented as 2D distances (expressed in arbitrary values). Similar pairs are placed close together and dissimilar pairs are placed far between each other (Fig. S3).

**Figure S3.** Left panel: Clustered gray matter (GM) distance matrices of the modeled activation (MA) maps relative to each of the examined experiments. Right panel: multidimensional scaling (MDS) of the modeled activation (MA) maps relative to each of the examined experiments (graphs



expressed in arbitrary units). In MDS graphs the multidimensional similarity/dissimilarity between pathology-derived MA maps are represented as 2D distances (expressed in arbitrary values). Similar pairs are placed close together and dissimilar pairs are placed far between each other.

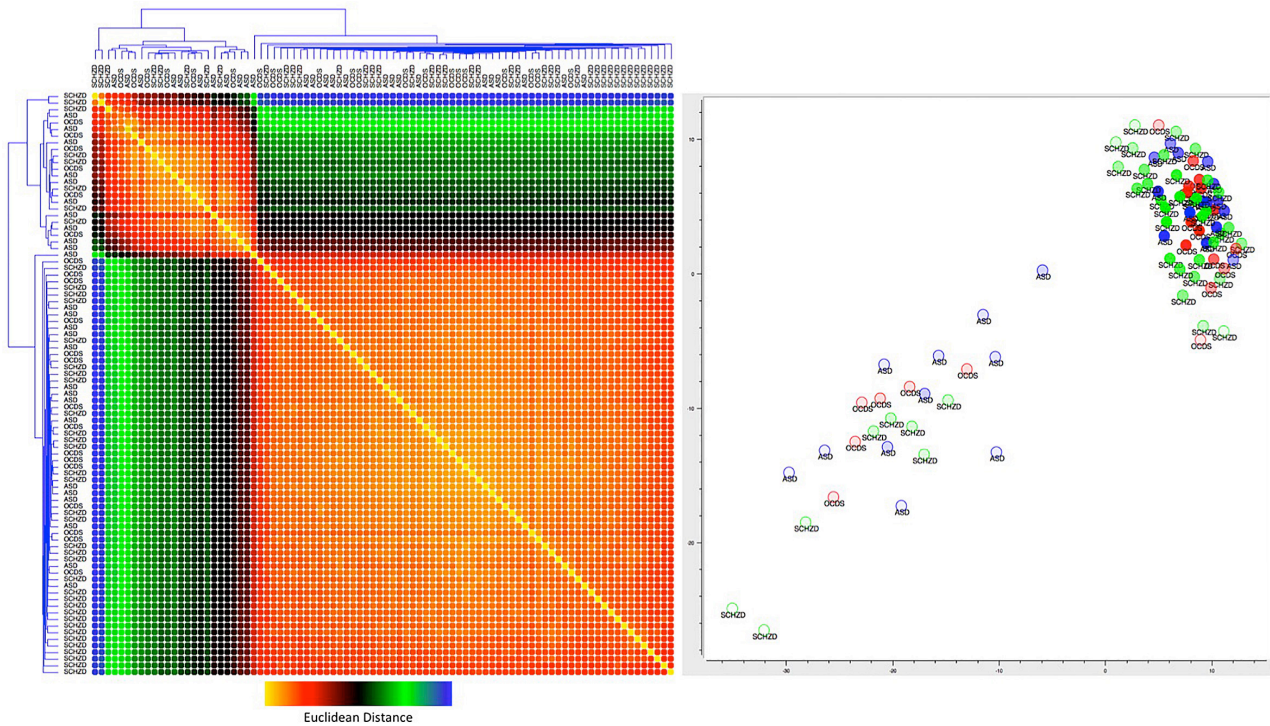

**Figure S4.** Patel's k values for the 70 co-atrophy edges.

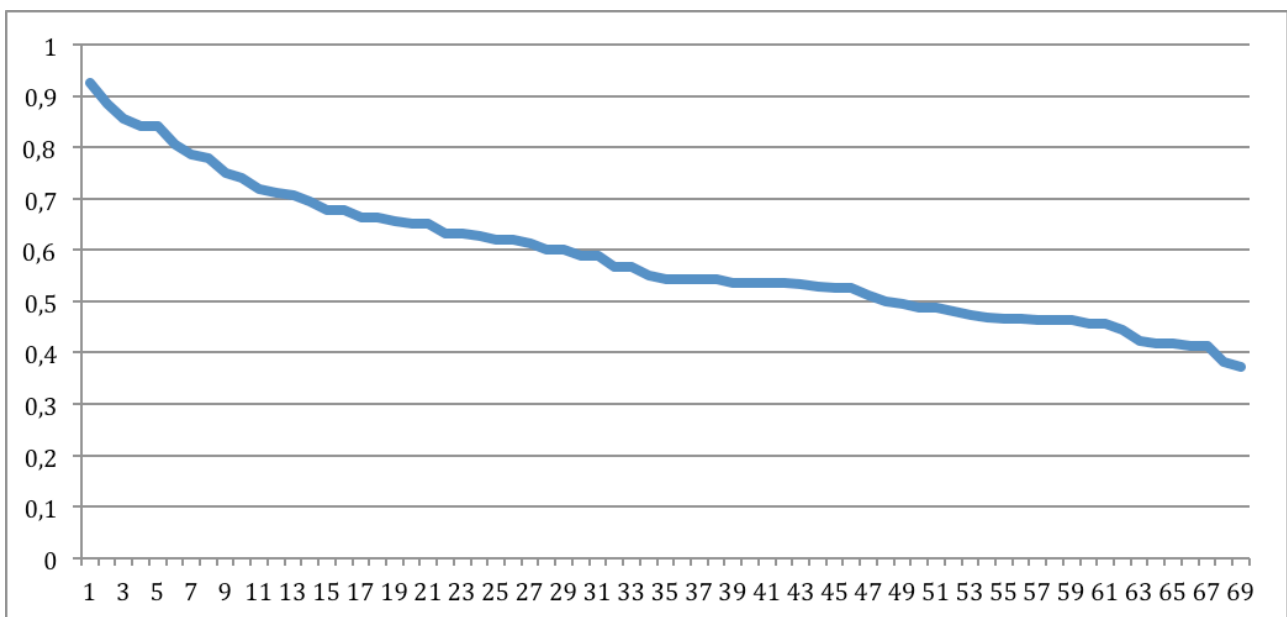

## Schizophrenia vs the whole dataset

The results obtained with the analysis of schizophrenia data only are very similar to those obtained with the analysis of the whole dataset, in which all the three spectra are taken into consideration (Fig. S5-S6). Changes regard in particular Patel's  $k$  values of single edges, but the two networks are substantially very similar. These results are consistent with those illustrated in Figure S3, which shows that the first cluster (encompassing all the three spectra) represents the most part of our data.

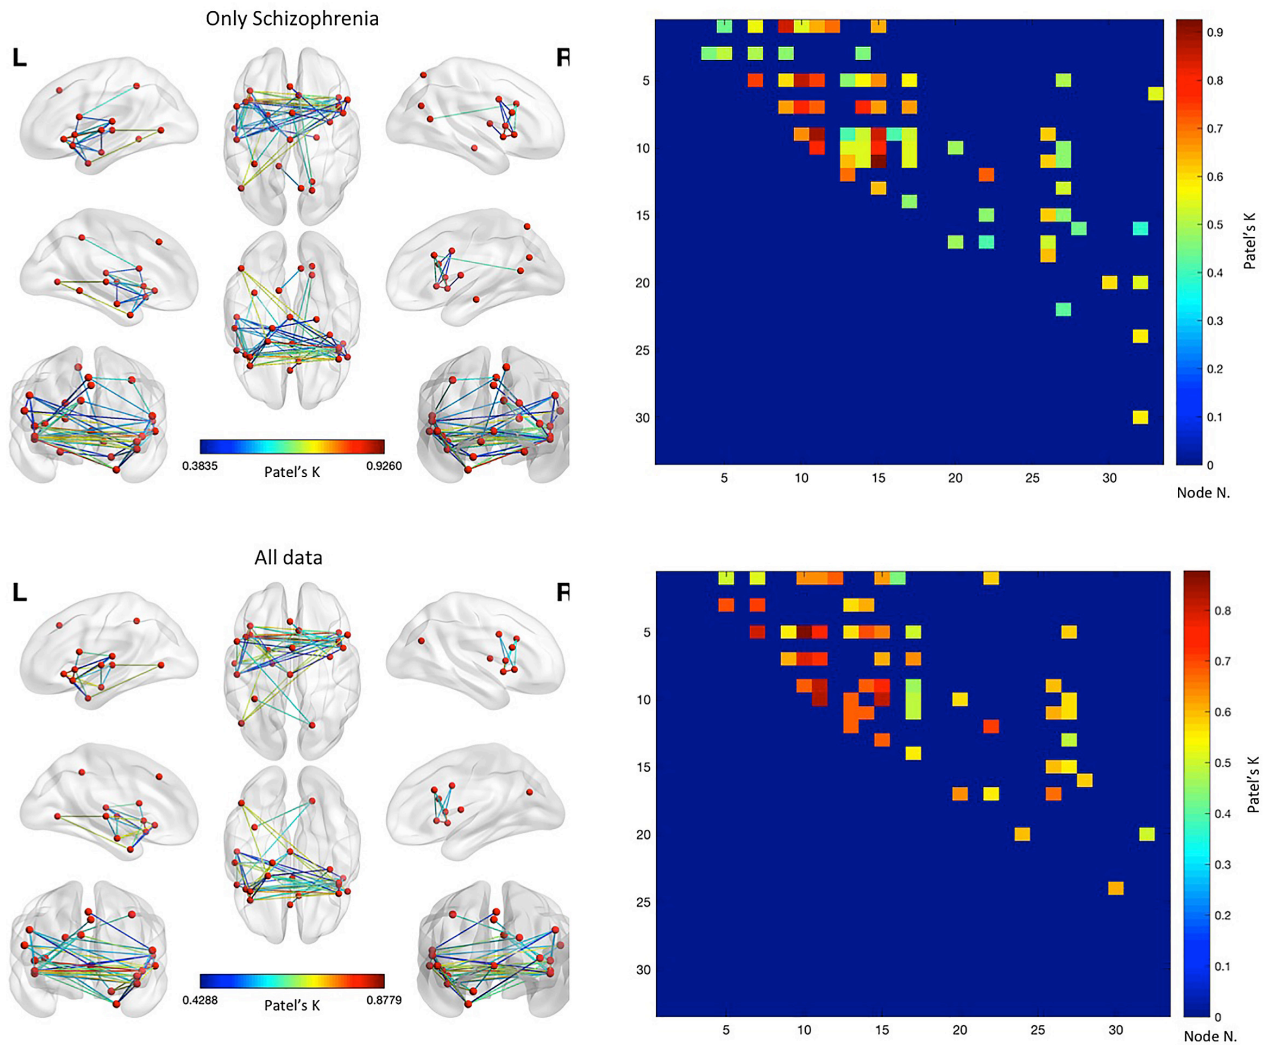

**Figure S5.** Results of the morphometric co-atrophy network constructed with schizophrenia data only or with the whole dataset. Colors from blue to red indicate increasing Patel's  $k$  values (i.e., increasing co-alteration probabilities).

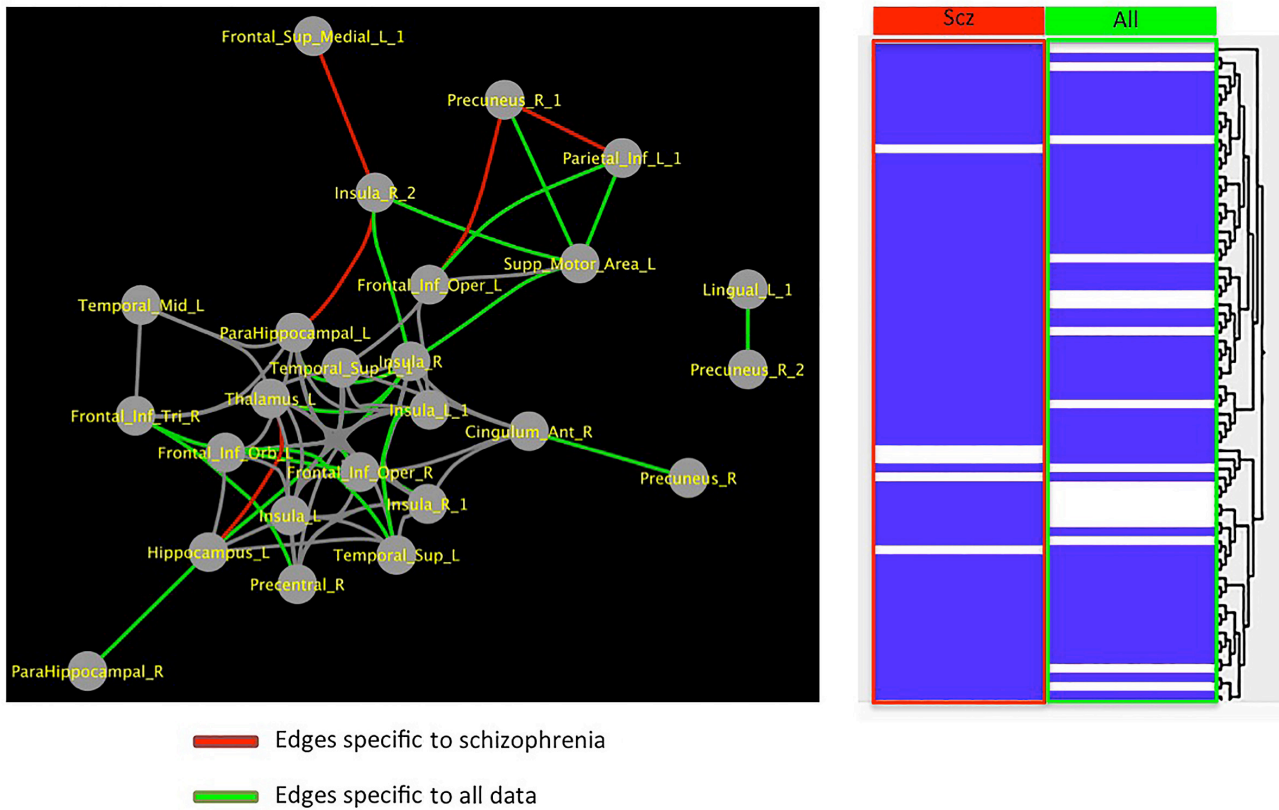

**Figure S6.** Results of the morphometric co-atrophy network constructed with schizophrenia data only or with the whole dataset. The left panel shows the differences between the results. Red edges are specific to schizophrenia, while green edges are specific to all the three spectra. The right panel shows the edges clustered by spatial distance. White lines indicate absence of edges, blue line their presence.

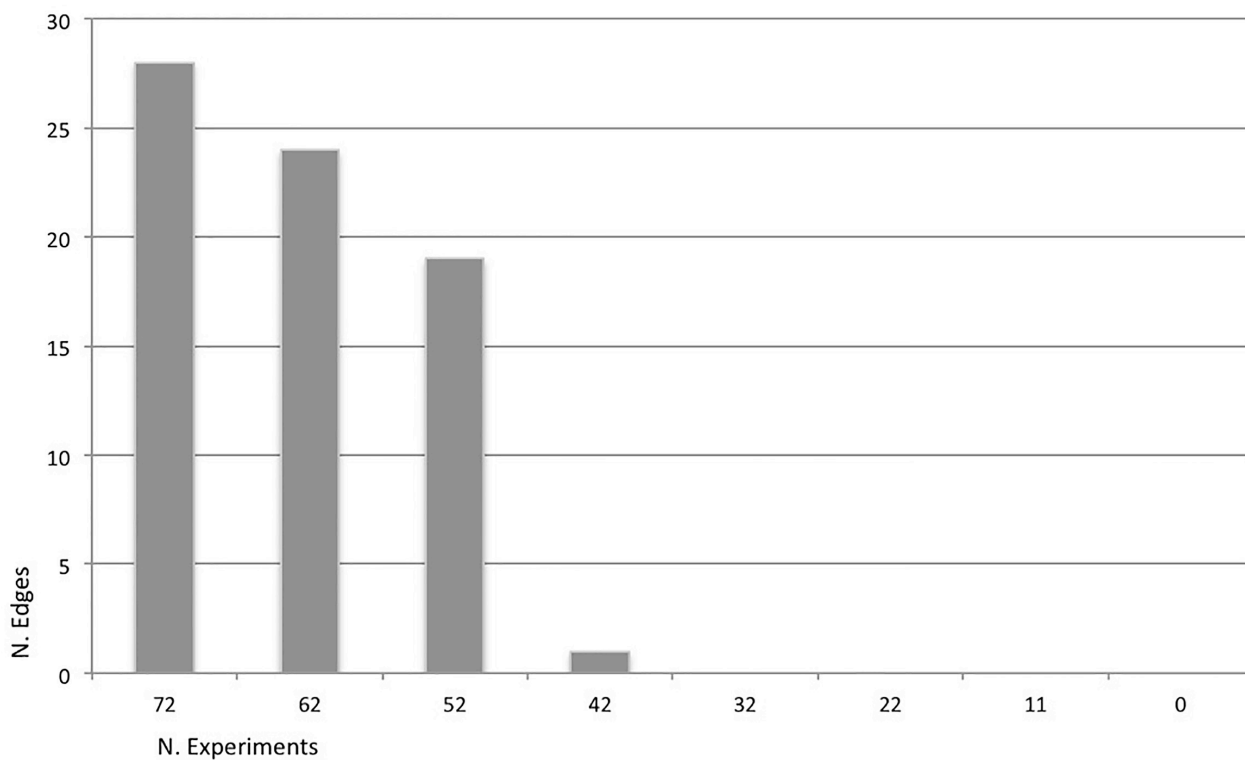

**Figure S7.** Relationship between experiments and edges in the Schizophrenia dataset. The figure illustrates how the results of the statistical analysis change if 10 experiments are removed from the SCZD sample at each simulation. With this procedure we were able to evaluate the variation of the number of significant edges estimated by our statistics. It is clear that the amount of edges decreases after every removal: after 50 experiments the number of significant edges collapses and after 40 experiments no edge can be identified.

## *References*

- Bishop, C. (2006) *Pattern Recognition and Machine Learning*. Springer-Verlag New York.
- Cauda, F., Costa, T., Palermo, S., D'Agata, F., Diano, M., Bianco, F., Duca, S., Keller, R. (2014) Concordance of white matter and gray matter abnormalities in autism spectrum disorders: A voxel-based meta-analysis study. *Human brain mapping*, 35:2073-98.
- Friston, K.J., Williams, S., Howard, R., Frackowiak, R.S., Turner, R. (1996) Movement-related effects in fMRI time-series. *Magnetic resonance in medicine : official journal of the Society of Magnetic Resonance in Medicine / Society of Magnetic Resonance in Medicine*, 35:346-55.
- Jaccard, P. (1901) Étude comparative de la distribution florale dans une portion des Alpes et des Jura. *Bulletin de la Société Vaudoise des Sciences Naturelles*, 37:547-579.
- Kaufman, L., Rousseeuw, P.J. (1990) *Finding groups in data*. Wiley, Hoboken, New Jersey.
- Kriegeskorte, N., Mur, M., Bandettini, P. (2008) Representational similarity analysis - connecting the branches of systems neuroscience. *Frontiers in systems neuroscience*, 2:4.
- Thirion, B., Varoquaux, G., Dohmatob, E., Poline, J.B. (2014) Which fMRI clustering gives good brain parcellations? *Frontiers in neuroscience*, 8:167.
- Yan, C.-G., Wang, X.-D., Zuo, X.-N., Zang, Y.-F. (2016) DPABI: Data Processing & Analysis for (Resting-State) Brain Imaging. *Neuroinformatics*, 14:339-351.
